# Supplementary material for: T cell receptor transgenic lymphocytes infiltrating murine tumors are not induced to express foxp3
Source: Springer Nature journal article supplement (doi:10.1186/1756-8722-4-48), 2011-11-23
Supplement: Additional file 2 [file 1756-8722-4-48-s2.pdf]

# BL/6-FoxP3<sup>GFP</sup>

Anti-CD3/CD28/IL2/TGF- $\beta$

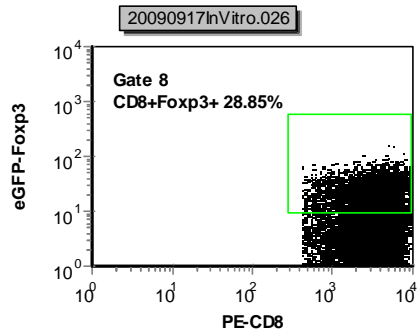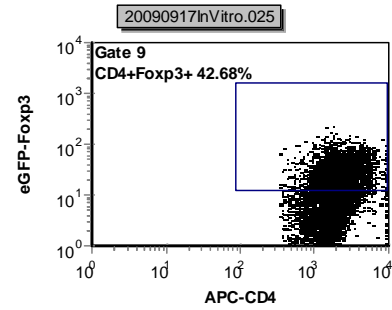

Anti-CD3/CD28/TGF- $\beta$

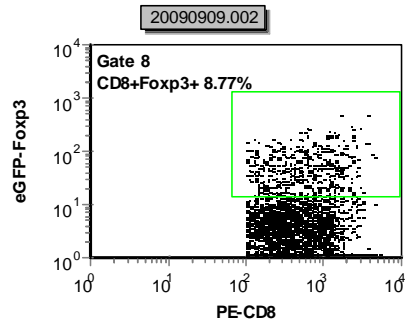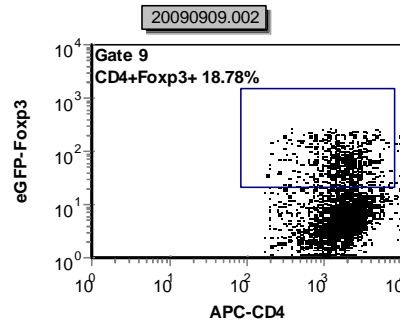

Anti-CD3/CD28/IL2

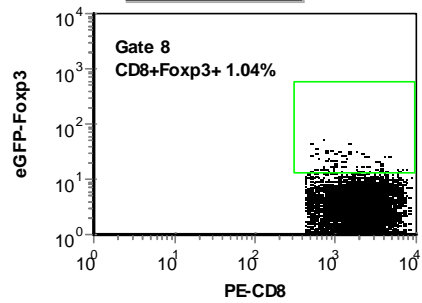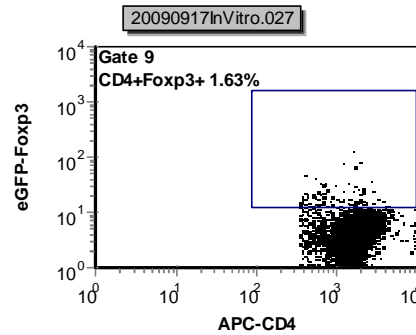

Anti-CD3/CD28

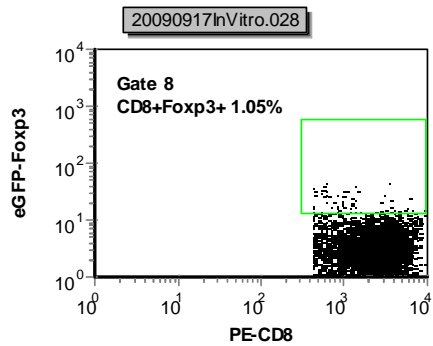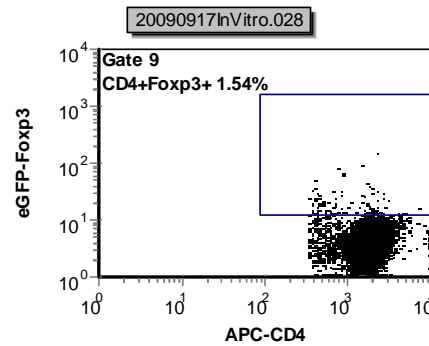

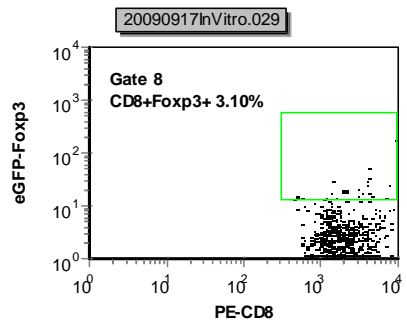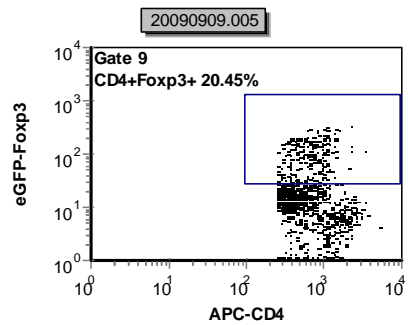

BL/6-FoxP<sub>3</sub><sup>GFP</sup>  
IL<sub>2</sub>/TGF-β

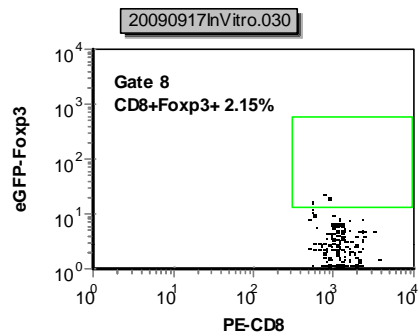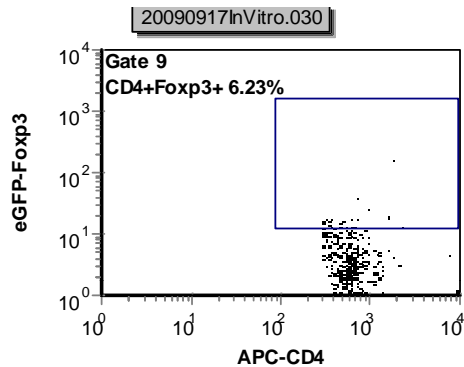

TGF-β

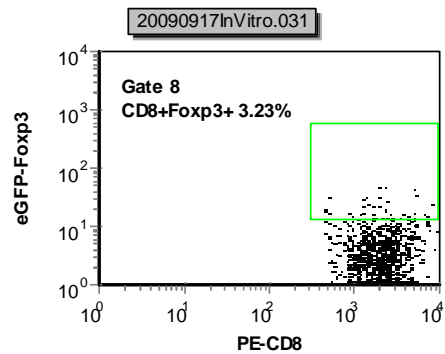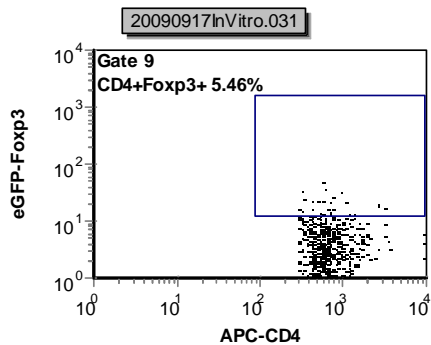

IL<sub>2</sub>

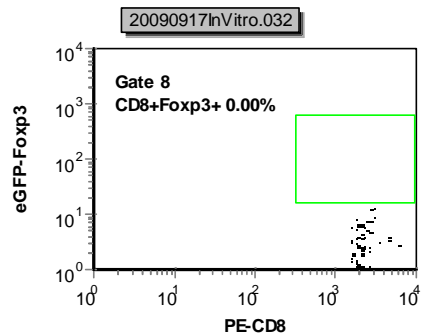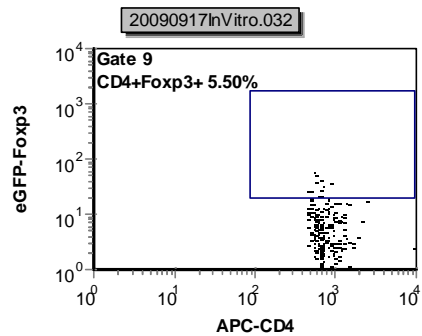

Only Media

# Pmel-FoxP3<sup>GFP</sup>

Anti-CD3/CD28/IL2/TGF- $\beta$

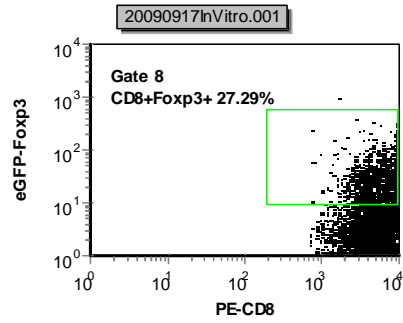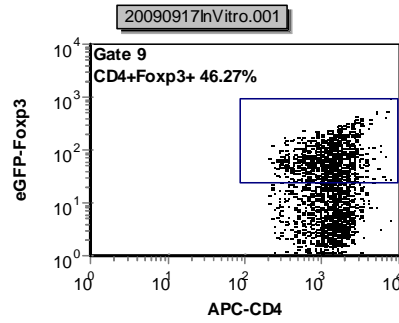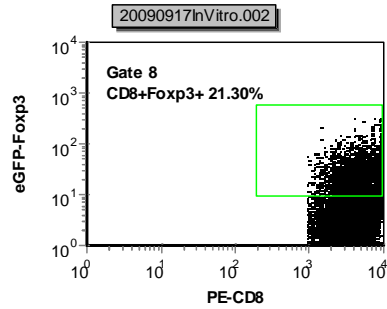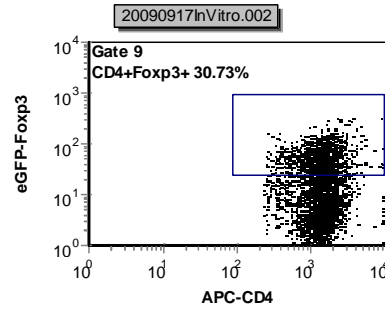

Anti-CD3/CD28/TGF- $\beta$

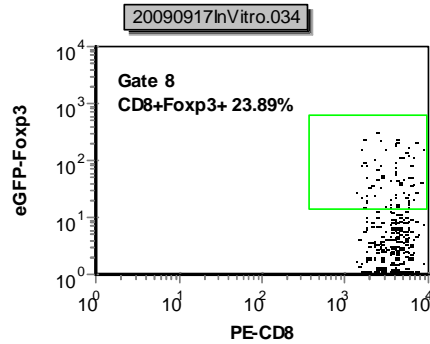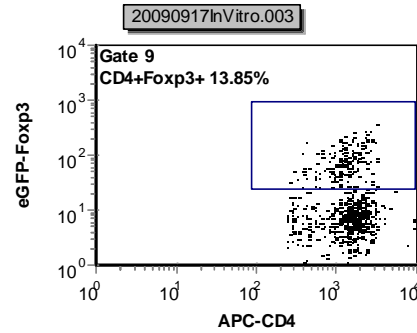

Anti-CD3/CD28/IL2

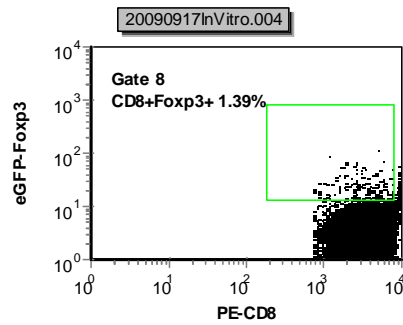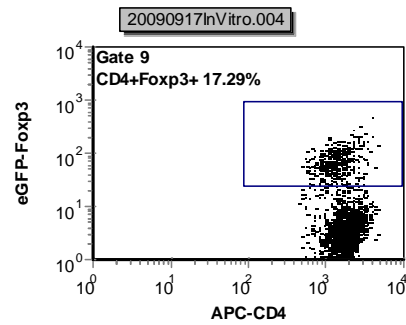

Anti-CD3/CD28

# Pmel-FoxP3<sup>GFP</sup>

IL<sub>2</sub>/TGF-β

TGF-β

IL<sub>2</sub>

Only Media

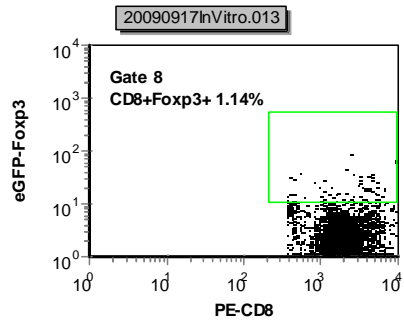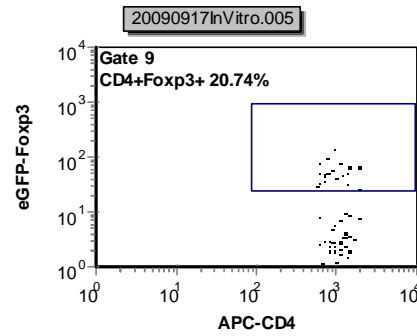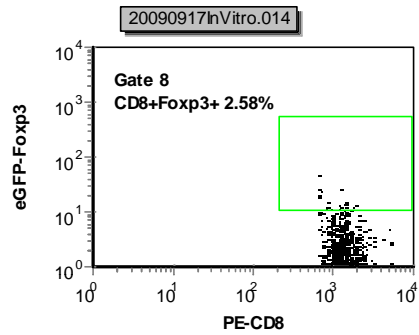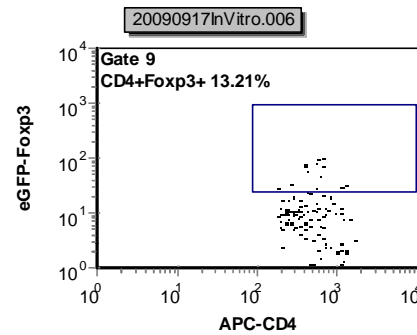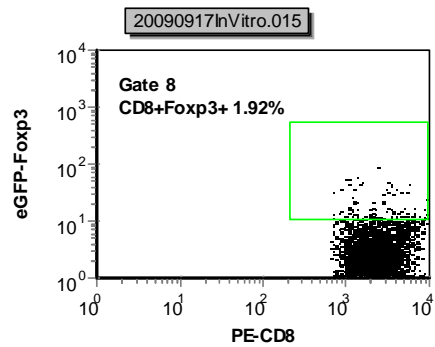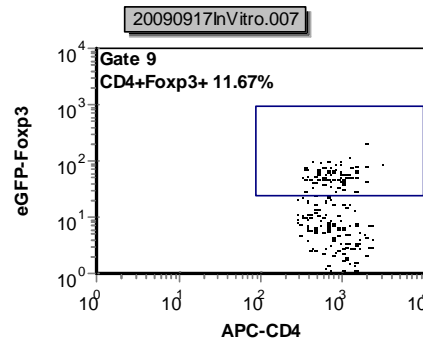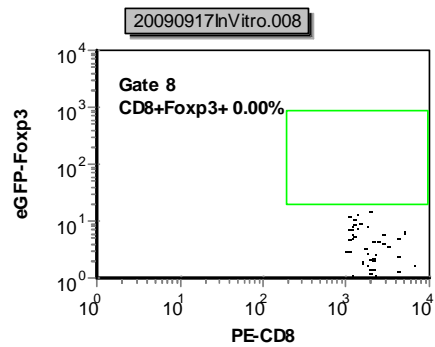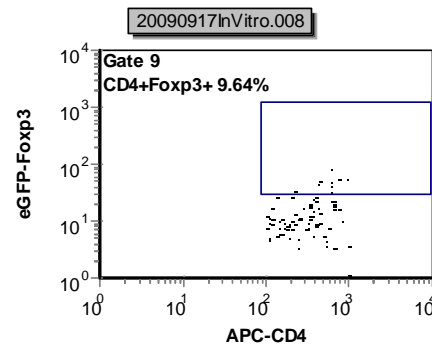

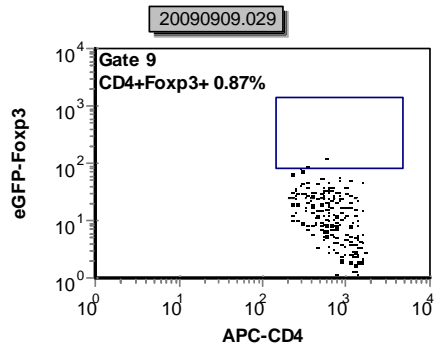

Only Media

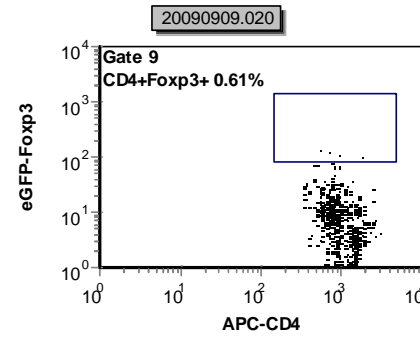

OT2-FoxP3<sup>GFP</sup>

IL<sub>2</sub>

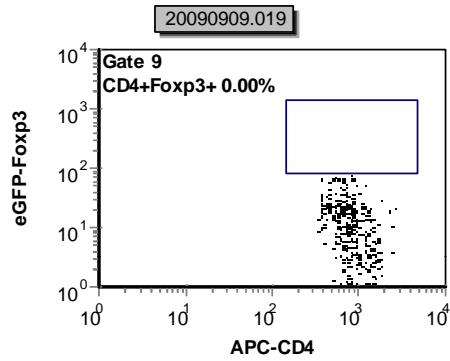

TGF- $\beta$

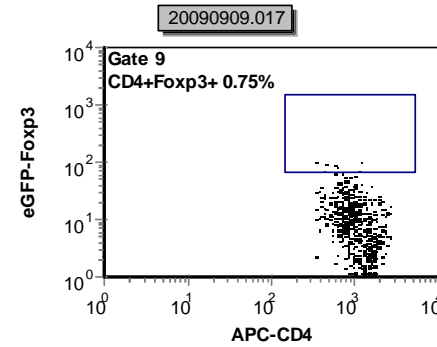

IL<sub>2</sub>/TGF- $\beta$

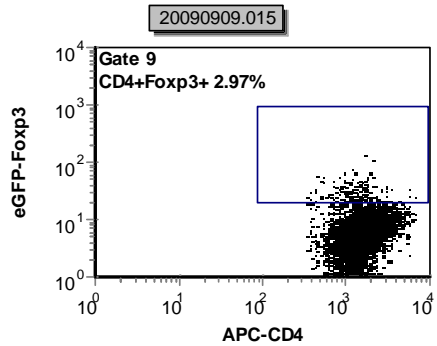

Anti-CD<sub>3</sub>/CD<sub>28</sub>

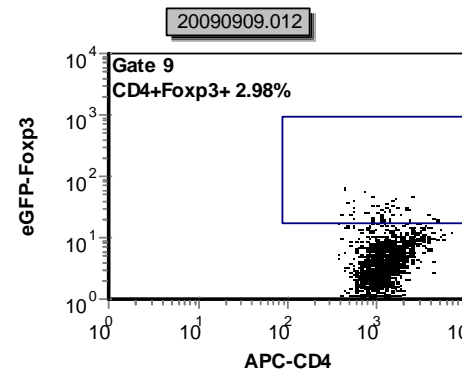

Anti-CD<sub>3</sub>/CD<sub>28</sub>/IL<sub>2</sub>

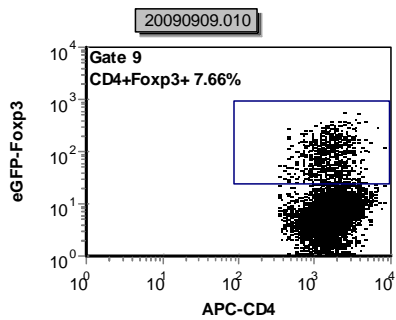

Anti-CD<sub>3</sub>/CD<sub>28</sub>/TGF- $\beta$

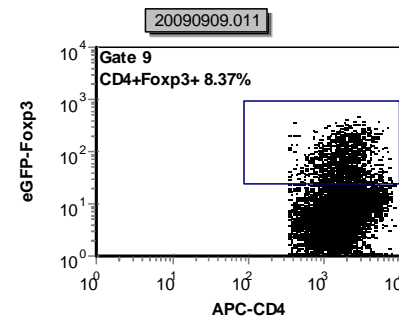

Anti-CD<sub>3</sub>/CD<sub>28</sub>/IL<sub>2</sub>/TGF- $\beta$
